# Supplementary material
Source: Research Square preprint supplement (doi:10.21203/rs.3.rs-8963245/v1)
Supplement: Supplementary file 1 [file 8bdbe1f491d2cfc439c8b742.docx]

**Supplementary material**

**Inferring transporter specificity through language model–guided**

**graph learning**

Tong Pan1,2, Jie Liu1, Jing Xu1, Rong Han3, Zixu Ran4, Xudong Guo4, Yi Hao4, Yue Bi2, Fuyi Li1,*, Jiangning Song2,5,*

1South Australian immunoGENomics Cancer Institute (SAiGENCI), The University of Adelaide, Adelaide, 5005, Australia;

2Biomedicine Discovery Institute and Department of Biochemistry and Molecular Biology, Monash University, Melbourne, VIC 3800, Australia;

3Department of Computer Science and Technology, Tsinghua University, Beijing 100084, China;

4Biomedicine College of Information Engineering, Northwest A&F University, Yangling 712100, China;

5Department of Veterinary Biosciences, Melbourne Veterinary School, The University of Melbourne, Parkville 3010, Australia

*Corresponding Authors: Jiangning Song, Email: [jiangning.song@monash.edu](mailto:jiangning.song@monash.edu); Fuyi Li, Email: [fuyi.li@adelaide.edu.au](mailto:fuyi.li@adelaide.edu.au).

**Figure S1. Performance benchmarking of seven different models in terms of the AUROC scores.**

**Figure S2. Distribution of transporter frequencies across substrate groups.** A polar plot illustrates the frequency (Freq) of five distinct substrate categories (amino acids, anions, cations, sugars, and others) distributed across four major transporter groups: channels/pores (C/P), electrochemical potential–driven transporters (EPT), primary active transporters (PAT), and group translocators (GT).

**Figure S3. Evaluation of model performance across five distinct substrate groups: amino acids, anions, cations, sugars, and others.** Performance is quantified using Accuracy, AUROC, MCC, and Precision.

**Figure S4. Performance of TraSPIN and SPOT as measured by AUPRC, stratified by transporter sequence identity**. Transporter proteins are grouped by sequence identity to evaluate model generalization across declining homology levels, with TraSPIN benmarked directly against SPOT.

**Figure S5. Performance of TraSPIN and SPOT as measured by AUROC, stratified by transporter sequence identity. Transporter proteins are grouped based on sequence identity to evaluate model generalization under declining homology levels, with TraSPIN benchmarked directly against SPOT.**

**Figure S6. Percentage distribution of the three domains of life within the test dataset.**

**Figure S7. Percentage distribution across major transporter groups.** The pie charts illustrate the proportional distribution of the three domains of life—within four distinct transporter categories: primary active transporters, channels/pores and electrochemical potential–driven transporters.

**Figure S8. Model performance of TraSPIN on overall substrate class prediction.** Performance is quantified using Accuracy, AUROC, AUPRC, and Fmax.

**Figure S9. Classification performance of TraSPIN across seven distinct substrate classes.**

**Table S1. Performance of TraSPIN stratified by substrate frequency in the training set.**

| **Number of identical substrates in the training set** | **Accuracy** | **Fmax** | **AUPRC** | **Counts** |
| --- | --- | --- | --- | --- |
| 1 | 0.7831 | 0.4375 | 0.5946 | 166 |
| 2 | 0.9231 | 0.8571 | 0.899 | 52 |
| 3 | 0.8496 | 0.6792 | 0.6464 | 113 |
| 4 | 0.8552 | 0.6866 | 0.765 | 145 |
| 5 | 0.8917 | 0.7937 | 0.8543 | 120 |
| 6 | 0.8839 | 0.7187 | 0.8332 | 155 |
| 7 | 0.8983 | 0.7778 | 0.9008 | 118 |
| 8 | 0.8578 | 0.6667 | 0.7162 | 211 |
| 9 | 0.8913 | 0.7059 | 0.8696 | 92 |
| 10 | 0.9074 | 0.8387 | 0.8666 | 54 |
| 11 | 0.9091 | 0.8108 | 0.889 | 77 |
| 12 | 0.9422 | 0.8897 | 0.9418 | 497 |

**Table S2. Impact of Component Removal on Model Performance.**

| **Metric** | **w/o cross-attention** | **w/o substructure** | **w/o structure** | **TrasPIN** |
| --- | --- | --- | --- | --- |
| Accuracy | 0.9266 | 0.8356 | 0.8327 | 0.9266 |
| Fmax | 0.8558 | 0.7086 | 0.7035 | 0.8558 |
| AUPRC | 0.9214 | 0.7426 | 0.7394 | 0.9557 |

**Table S3. Performance of TraSPIN stratified by sequence identity.**

| Sequence identity | Counts | AUROC | AUPRC |
| --- | --- | --- | --- |
| (0, 30] | 167 | 0.8116 | 0.6405 |
| (30, 40] | 74 | 0.932 | 0.8561 |
| (40, 50] | 118 | 0.9325 | 0.8803 |
| (50, 60] | 142 | 0.9786 | 0.9434 |
| (60, 70] | 195 | 0.9804 | 0.9766 |
| (70, 80] | 226 | 0.997 | 0.992 |
| (80, 100] | 1411 | 0.993 | 0.9876 |

**Table S4. Computational prediction of substrate specificity in solute carrier proteins.**

| UniProt_ID | Localisation | Substrate | KEGG_ID | Label | Predicted probability |
| --- | --- | --- | --- | --- | --- |
| Q9Y5Y0 | PM | Heme | C00032 | 1 | 0.50000447 |
| Q9UPI3 | Unknown | Heme | C00032 | 1 | 0.50000274 |
| Q86VI4 | IC | Ceramide | C00195 | 1 | 0.50001943 |
| Q9H3U5 | PM | Arg-Ala | C05340 | 1 | 0.50052685 |
| Q8NA29 | PM | Docosahexaenoic acid | C06429 | 1 | 0.50058413 |
| Q9Y5U8 | IC | Pyruvate | C00022 | 1 | 0.58303243 |
| P0DKB6 | IC | Pyruvate | C00022 | 1 | 0.59632069 |
| O95563 | IC | Pyruvate | C00022 | 1 | 0.71688229 |
| Q9UHC9 | PM | Sitosterol | C01753 | 1 | 0.59532952 |
| Q14973 | PM | Estrone-3-sulfate | C02538 | 1 | 0.50002569 |
| Q3KNW5 | PM | Estrone-3-sulfate | C02538 | 1 | 0.50001305 |
| Q3KNW5 | PM | Œ≤-estradiol-3-sulfate | C08357 | 1 | 0.50001699 |
| Q3KNW5 | PM | Dehydroepiandrosterone sulfate | C04555 | 1 | 0.5000118 |
| Q8WWT9 | PM | Oxaloacetate | C00036 | 1 | 0.63537091 |
| Q86YT5 | PM | Pyruvate | C00022 | 1 | 0.50000364 |
| P53985 | PM | Acetoacetate | C00164 | 1 | 0.50555414 |
| P53985 | PM | Pyruvate | C00022 | 1 | 0.50067663 |
| Q8NCK7 | PM | Pyruvate | C00022 | 1 | 0.73061979 |
| O15427 | PM | Acetoacetate | C00164 | 1 | 0.71686941 |
| O60669 | PM | Pyruvate | C00022 | 1 | 0.73026168 |
| O00476 | PM | Estrone-3-sulfate | C02538 | 1 | 0.50001246 |
| Q9NRA2 | PM | Pyruvate | C00022 | 1 | 0.50000602 |
| P54219 | IC | Epinephrine | C00788 | 1 | 0.50000834 |
| Q05940 | IC | Epinephrine | C00788 | 1 | 0.50000983 |
| Q05940 | IC | Histamine | C00388 | 1 | 0.6622023 |
| Q6NT16 | IC | Spermine | C00750 | 1 | 0.50008833 |
| P41440 | PM | 2'-3'-cGAMP | C20640 | 1 | 0.73078412 |
| Q9BZV2 | PM | Pyridoxine | C00314 | 1 | 0.50007021 |
| O15245 | PM | Agmatine | C00179 | 1 | 0.50076365 |
| Q9NSA0 | PM | Estrone-3-sulfate | C02538 | 1 | 0.50005162 |
| Q9NSA0 | PM | Dehydroepiandrosterone sulfate | C04555 | 1 | 0.55402809 |
| Q9Y267 | IC | Riboflavin | C00255 | 1 | 0.73102784 |
| Q8IZD6 | PM | Ergothioneine | C05570 | 1 | 0.50001234 |
| Q86VW1 | PM | Nicotinamide mononucleotide | C00455 | 1 | 0.50002617 |
| O15244 | PM | Agmatine | C00179 | 1 | 0.73073852 |
| O15244 | PM | Epinephrine | C00788 | 1 | 0.62348938 |
| O15244 | PM | Histamine | C00388 | 1 | 0.73033893 |
| Q8N4F4 | PM | Estrone-3-sulfate | C02538 | 1 | 0.50006127 |
| Q8N4F4 | PM | Glycocholate | C01921 | 1 | 0.50005776 |
| O75751 | PM | Epinephrine | C00788 | 1 | 0.50004363 |
| O75751 | PM | Histamine | C00388 | 1 | 0.64686453 |
| Q9H015 | PM | Ergothioneine | C05570 | 1 | 0.50001001 |
| Q4U2R8 | PM | Indole acetate | C00954 | 1 | 0.50005633 |
| Q4U2R8 | PM | Xanthurenate | C02470 | 1 | 0.60990554 |
| Q9Y694 | PM | cGMP | C00942 | 1 | 0.53673625 |
| Q9Y694 | PM | Estrone-3-sulfate | C02538 | 1 | 0.5000214 |
| Q8TCC7 | PM | Estrone-3-sulfate | C02538 | 1 | 0.5000146 |
| Q8IVM8 | PM | Estrone-3-sulfate | C02538 | 1 | 0.50003976 |
| O95258 | IC | Maleate | C01384 | 1 | 0.50073332 |
| O95258 | IC | Citramalate | C00815 | 1 | 0.50230795 |
| Q5SVS4 | IC | Maleate | C01384 | 1 | 0.53741229 |
| Q5SVS4 | IC | Citramalate | C00815 | 1 | 0.5267821 |
| Q9H2D1 | IC | Tetrahydrofolate | C00101 | 1 | 0.50002956 |
| Q9BSK2 | IC | TDP | C00363 | 1 | 0.50001967 |
| Q9BSK2 | IC | TTP | C00459 | 1 | 0.50001287 |
| Q96CQ1 | IC | IDP | C00104 | 1 | 0.50004959 |
| Q96CQ1 | IC | IMP | C00130 | 1 | 0.50100279 |
| Q96CQ1 | IC | ITP | C00081 | 1 | 0.50001711 |
| Q9H2B4 | PM | Formate | C00058 | 1 | 0.51445144 |
| Q14542 | PM | Cytosine | C00380 | 1 | 0.68466336 |
| Q7RTT9 | PM | Epinephrine | C00788 | 1 | 0.50002915 |
| Q7RTT9 | PM | Histamine | C00388 | 1 | 0.56581616 |
| P11166 | PM | Glucose | C00031 | 1 | 0.73084509 |
| O95528 | IC | Glucose | C00031 | 1 | 0.71543592 |
| Q9BYW1 | PM | Fructose | C00095 | 1 | 0.50000536 |
| Q9BYW1 | PM | Glucose | C00031 | 1 | 0.73098356 |
| Q8TD20 | PM | Glucose | C00031 | 1 | 0.73100936 |
| Q8TDB8 | PM | Dehydroascorbic acid | C05422 | 1 | 0.73029733 |
| Q8TDB8 | PM | Glucose | C00031 | 1 | 0.73052329 |
| P11168 | PM | Fructose | C00095 | 1 | 0.73033732 |
| P11168 | PM | Galactose | C00124 | 1 | 0.50001061 |
| P11168 | PM | Glucose | C00031 | 1 | 0.68500584 |
| P11169 | PM | Galactose | C00124 | 1 | 0.5000065 |
| P11169 | PM | Glucose | C00031 | 1 | 0.73085898 |
| P14672 | PM | Glucose | C00031 | 1 | 0.70797056 |
| P22732 | PM | Fructose | C00095 | 1 | 0.7309919 |
| Q6PXP3 | PM | Glucose | C00031 | 1 | 0.73098636 |
| Q6PXP3 | PM | Fructose | C00095 | 1 | 0.73091608 |
| Q9NRM0 | PM | Glucose | C00031 | 1 | 0.50008011 |
| Q8TB61 | IC | 3'-Phosphoadenosine-5'-phosphosulfate (PAPS) | C00053 | 1 | 0.73081869 |
| Q9H1N7 | IC | 3'-Phosphoadenosine-5'-phosphosulfate (PAPS) | C00053 | 1 | 0.73047942 |
| Q7Z2H8 | PM | homotarine | C03349 | 1 | 0.73089319 |
| Q7Z2H8 | PM | alpha-aminoisobutyrate | C01205; C03284 | 1 | 0.67094481 |
| Q7Z2H8 | PM | Beta-guanidinopropionic acid | C03065 | 1 | 0.50000697 |
| P57057 | IC | Glucose | C00031 | 1 | 0.50003332 |
| Q53GD3 | PM | Thiamine pyrophosphate | C00068 | 1 | 0.66564971 |
| Q9Y2W3 | PM | Glucose | C00031 | 1 | 0.72990018 |
| Q9Y2W3 | PM | Galactose | C00124 | 1 | 0.50088006 |
| Q96NT5 | PM | Heme | C00032 | 1 | 0.50010175 |
| Q9BY10 | PM | cGAMP | C20640 | 1 | 0.7300784 |
| Q7Z3Q1 | IC | Estrone 3 sulfate | C02538 | 1 | 0.50001073 |
| Q7Z3Q1 | IC | Dehydroepiandrosterone sulfate | C04555 | 1 | 0.50001127 |
| Q7Z3Q1 | IC | Pregnenolone sulfate | C18044 | 1 | 0.50000954 |
| Q7Z3Q1 | IC | Glycocholate | C01921 | 1 | 0.5000087 |
| Q96FL8 | PM | Estrone-3-sulfate | C02538 | 1 | 0.50002211 |
| Q96FL8 | PM | Guanidine | C17349 | 1 | 0.70115012 |
| Q86VL8 | PM | Estrone-3-sulfate | C02538 | 1 | 0.50003219 |
| Q86VL8 | PM | Guanidine | C17349 | 1 | 0.50038356 |
| Q6P1K1 | IC | Heme | C00032 | 1 | 0.50000322 |
| Q96SL1 | IC | Pyridoxine | C00314 | 1 | 0.57698697 |
| Q9BRV3 | PM | Glucose | C00031 | 1 | 0.72942162 |
| Q86UW1 | PM | Dehydroepiandrosterone sulfate | C04555 | 1 | 0.50000942 |
| Q86UW1 | PM | Estrone-3-sulfate | C02538 | 1 | 0.50000989 |
| Q86UW2 | PM | Dehydroepiandrosterone sulfate | C04555 | 1 | 0.50000888 |
| Q86UW2 | PM | Estrone-3-sulfate | C02538 | 1 | 0.50000894 |
| Q9NWF4 | PM | Riboflavin | C00255 | 1 | 0.72980207 |
| Q9HAB3 | PM | Riboflavin | C00255 | 1 | 0.64377803 |
| Q9NQ40 | PM | Riboflavin | C00255 | 1 | 0.63072294 |
| P13866 | PM | Galactose | C00124 | 1 | 0.50000781 |
| P13866 | PM | Glucose | C00031 | 1 | 0.73100775 |
| A0PJK1 | PM | Fructose | C00095 | 1 | 0.50001973 |
| A0PJK1 | PM | Galactose | C00124 | 1 | 0.50001264 |
| A0PJK1 | PM | Glucose | C00031 | 1 | 0.7304247 |
| Q1EHB4 | PM | Acetoacetate | C00164 | 1 | 0.54969776 |
| P31639 | PM | Glucose | C00031 | 1 | 0.73076975 |
| P31639 | PM | Galactose | C00124 | 1 | 0.50002462 |
| Q8N695 | PM | Acetoacetate | C00164 | 1 | 0.50268734 |
| Q8N695 | PM | Pyruvate | C00022 | 1 | 0.50003123 |
| Q2M3M2 | Unknown | 1,5-Anhydroglucitol | C07326 | 1 | 0.50005049 |
| Q2M3M2 | Unknown | Fructose | C00095 | 1 | 0.50001812 |
| Q2M3M2 | Unknown | Glucose | C00031 | 1 | 0.7308315 |
| Q6ZP29 | IC | Canavanine | C00308 | 1 | 0.72932959 |
| P46721 | PM | Glycocholate | C01921 | 1 | 0.50002313 |
| P46721 | PM | Bilirubin | C00486 | 1 | 0.50011104 |
| P46721 | PM | Estrone-3-sulfate | C02538 | 1 | 0.50002676 |
| P46721 | PM | Dehydroepiandrosterone sulfate | C04555 | 1 | 0.5000369 |
| Q9Y6L6 | PM | Bilirubin | C00486 | 1 | 0.50022787 |
| Q9Y6L6 | PM | Monoglucuronosyl bilirubin | C03374 | 1 | 0.50001878 |
| Q9Y6L6 | PM | Bisglucuronosyl bilirubin | C05787 | 1 | 0.50001389 |
| Q9Y6L6 | PM | Estrone-3-sulfate | C02538 | 1 | 0.50001949 |
| Q9Y6L6 | PM | Leukotriene E4 | C03577 | 1 | 0.50000829 |
| Q9Y6L6 | PM | Dehydroepiandrosterone sulfate | C04555 | 1 | 0.50001621 |
| Q9NPD5 | PM | Estrone-3-sulfate | C02538 | 1 | 0.50002182 |
| Q9NPD5 | PM | Dehydroepiandrosterone sulfate | C04555 | 1 | 0.50001889 |
| Q9NPD5 | PM | Monoglucuronosyl bilirubin | C03374 | 1 | 0.50002539 |
| Q9NPD5 | PM | Bisglucuronosyl bilirubin | C05787 | 1 | 0.50001717 |
| G3V0H7 | PM | Dehydroepiandrosterone sulfate | C04555 | 1 | 0.50002342 |
| Q9NYB5 | PM | Estrone-3-sulfate | C02538 | 1 | 0.50002623 |
| O94956 | PM | Dehydroepiandrosterone sulfate | C04555 | 1 | 0.50197691 |
| O94956 | PM | Estrone-3-sulfate | C02538 | 1 | 0.50004017 |
| O94956 | PM | Pregnenolone sulfate | C18044 | 1 | 0.50016898 |
| Q96BD0 | PM | Estrone-3-sulfate | C02538 | 1 | 0.50003827 |
| Q6ZQN7 | PM | Estrone-3-sulfate | C02538 | 1 | 0.5000205 |
| Q6ZQN7 | PM | L-homoarginine | C01924 | 1 | 0.50000817 |
| Q9P0S9 | IC | Protoporphyrinogen IX | C01079 | 1 | 0.5000149 |
| P30536 | IC | Protoporphyrinogen IX | C01079 | 1 | 0.50002646 |
| P55851 | IC | Oxaloacetate | C00036 | 1 | 0.73020399 |

**Evaluation metrics**

Model performance was quantified using multiple complementary metrics, including Accuracy, maximum F1-score (Fmax), area under the receiver operating characteristic curve (AUROC), and area under the precision–recall curve (AUPRC). *TP*, *TN*, *FP*, and *FN* denote the numbers of true positives, true negatives, false positives, and false negatives, respectively.

### **Accuracy** measures the proportion of correctly classified samples among all predictions:

### **Fmax** ( Maximum F1-score): the F1-score is the harmonic mean of precision and recall:

Since the F1-score depends on the decision threshold , we report the maximum F1-score across all thresholds:

### **AUROC** (The receiver operating characteristic curve) plots:

AUROC is defined as the area under the ROC curve:

### **AUPRC** (The precision–recall curve) plots Precision against Recall across thresholds. AUPRC is defined as follows:
